# Supplementary material
Source: PubMed Central journal article supplement (PMC3788078)
Supplement: NIHMS499759-supplement-Supp_Figure_S1-S3.pdf [file NIHMS499759-supplement-Supp_Figure_S1-S3.pdf]

# Supplementary figure 1

**A**

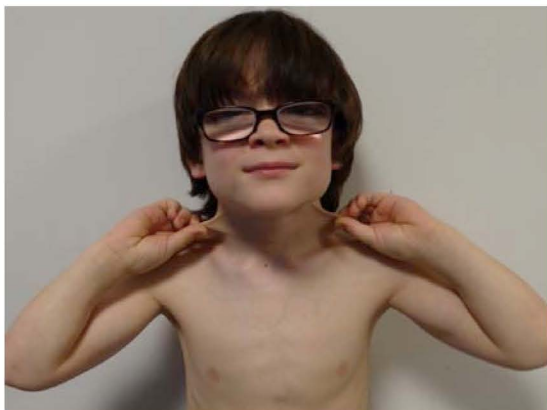

**B**

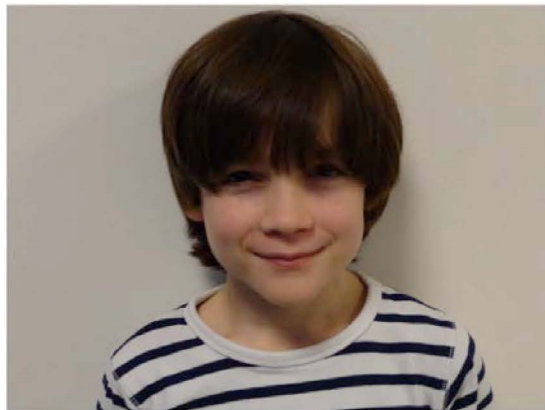

**C**

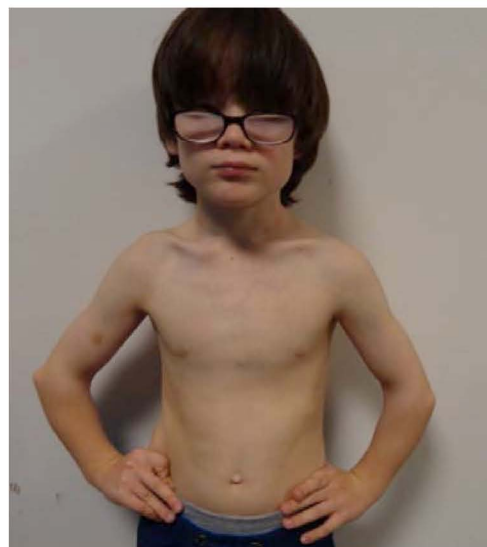

**D**

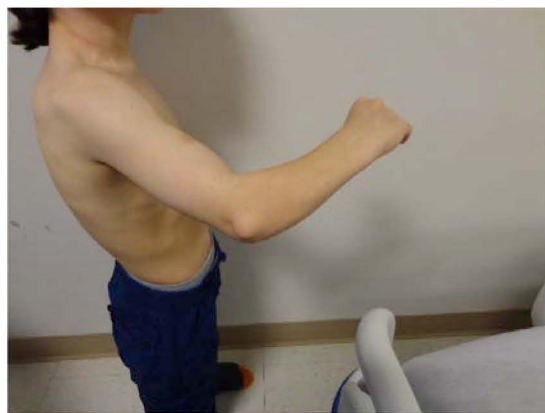

**E**

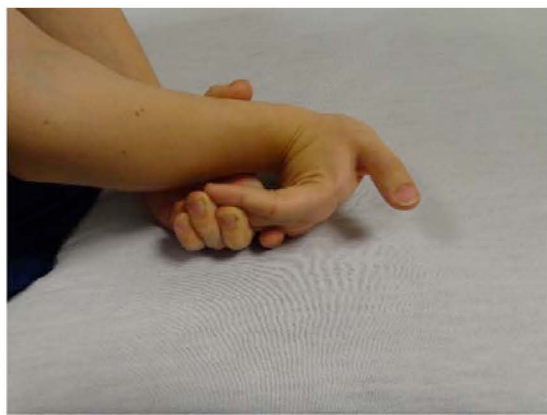

**F**

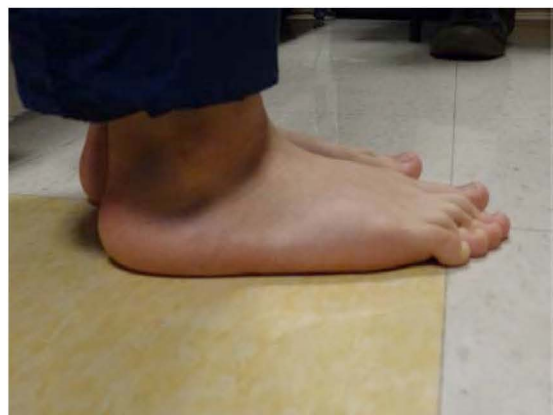

# Supplementary figure 2

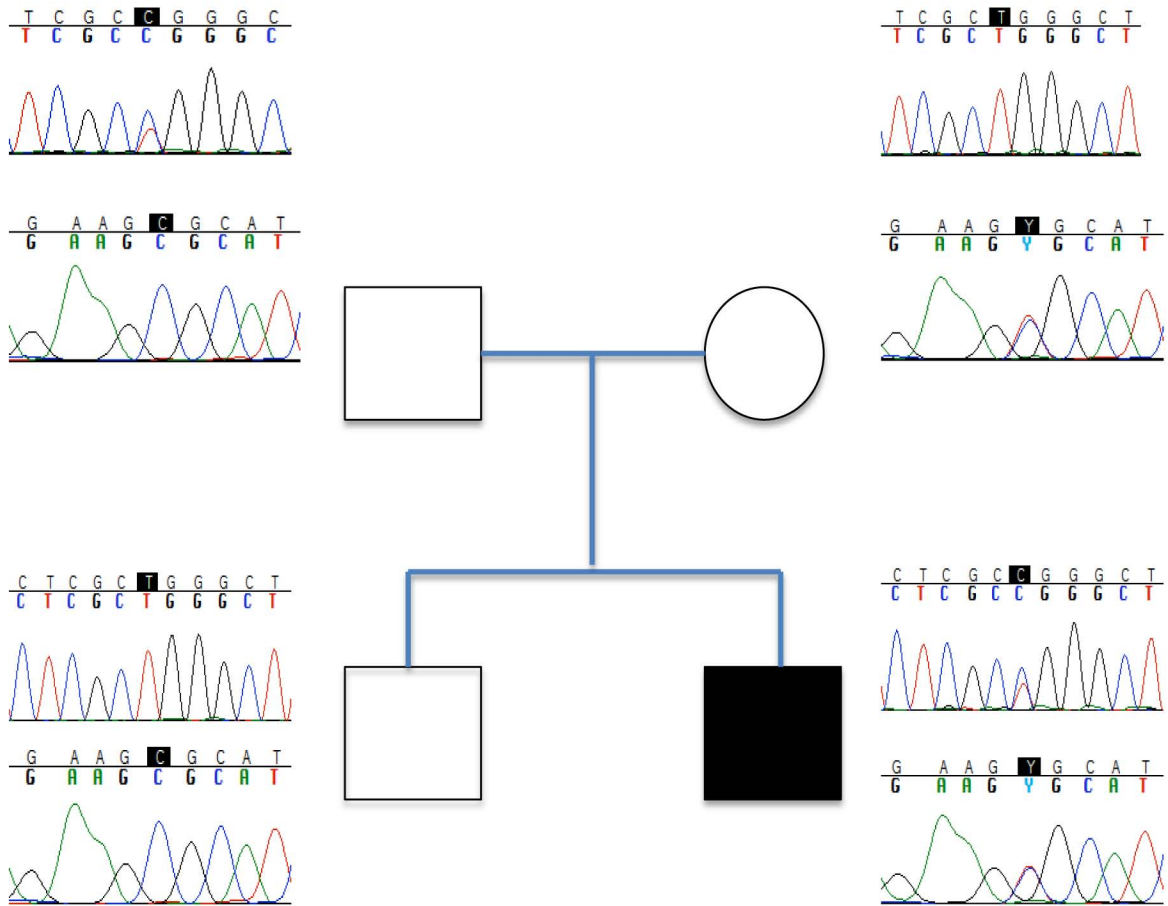

Sanger sequencing for patient and family at *B4GALT7* nucleotide positions 122 (reference allele, T) and 808 (reference allele, C). Top chromatogram for each individual is position 122 and bottom chromatogram is position 808. The c.122T>C was transmitted from the father to the patient, and the c.808C>T was transmitted from the mother to the patient, resulting in a compound heterozygous state for the patient. The unaffected sibling is homozygous wild type for both alleles.

# Supplementary figure 3

**A**

|                 |     |                                                                                        |     |
|-----------------|-----|----------------------------------------------------------------------------------------|-----|
| H. sapiens      | 1   | MFPSRRKAAQLPWEDGRSGLLSGGLPRKCSVFHLFVACL <b>SL</b> GGFF-----S                           | 45  |
| Chimpanzee      | 1   | MFPSRRKAAQLPWEDGRSGLLSGGLPRKCSVFHLFVACL <b>SL</b> GGFF-----S                           | 45  |
| Macaque         | 1   | MFPSRRKAAQLPWEDGRSRLLSGSLPRKCSVFHLFVACL <b>LL</b> GGCF-----S                           | 45  |
| Dog             | 1   | -----MGTFLA-----SRLVPGGLPRKCSVFHLFVACL <b>SL</b> GGFL-----S                            | 34  |
| Mouse           | 1   | MLPSRRKAAQLPWEDGRARLLPGGLRRKCSIFHLFIAFLL <b>LV</b> FFF-----S                           | 45  |
| Rat             | 1   | MLPSRRKAAQLPWEDGRARLLPGGLRRKCSIFHLFIAFLL <b>LV</b> FFF-----S                           | 45  |
| Chicken         | 1   | MGPGRRAA-LRLRGGGSPQLLGLLAGKFSIFQLFFLALL <b>LL</b> GFPA-----S                           | 44  |
| Zebrafish       | 1   | MMYSSRRKPVLYFKDERS-----FLSRKCTVWKLFGLCM <b>V</b> FVFG-----S                            | 40  |
| D. melanogaster | 1   | -----MVNISTINWVFCVGL <b>S</b> FCLGGIIVLS                                               | 26  |
| C. elegans      | 1   | -----MKLKTRLILSGTILISL <b>A</b> ACYF----LV                                             | 24  |
|                 |     |                                                                                        |     |
| H. Sapiens      | 239 | GLQLFRPSGITTGY-KTFRHLHDPAWRKR <b>D</b> ---Q <b>K</b> RIAAQKQEQFKVDRE                   | 284 |
| Chimpanzee      | 239 | GLQLFRPSGITTGY-KTFRHLHDPAWRKR <b>D</b> ---Q <b>K</b> RIAAQKQEQFKVDRE                   | 284 |
| Macaque         | 239 | GLQLFRPSGITTGY-KTFRHLHDPAWRKR <b>D</b> ---Q <b>K</b> RIAAQKQEQFKVDRE                   | 284 |
| Dog             | 228 | GLQLFRPSGITTGY-KTFRHLHDPAWRKR <b>D</b> ---Q <b>K</b> RIAAQKQEQFKVDRE                   | 273 |
| Mouse           | 239 | GLQLFRPSGITTGY-QTFRHLHDPAWRKR <b>D</b> ---Q <b>K</b> RIAAQKQEQFKVDRE                   | 284 |
| Rat             | 239 | GLQLFRPLGITTGY-QTFRHLHDPAWRKR <b>D</b> ---Q <b>K</b> RIAAQKQEQFKVDRE                   | 284 |
| Chicken         | 231 | GLQVHRPSGITTGY-ETFQHLHDPAWRKR <b>D</b> ---Q <b>K</b> RIAAQKQEQFKVDRE                   | 276 |
| Zebrafish       | 229 | NLELFRPTGITTGT-KTFRHIHDPAWRKR <b>D</b> ---Q <b>K</b> RIAAQKQEQFKVDPE                   | 274 |
| D. melanogaster | 222 | GLQVTRPQNIKTGTNDTFSHIHNR <b>Y</b> HRKR <b>D</b> ---T <b>Q</b> KCFNQKEMTRKR <b>D</b> HK | 268 |
| C. elegans      | 199 | KLNLTRVSGSLSTDSSTFRHIHGPK-RKR <b>D</b> YTP <b>K</b> KN <b>D</b> KNQWEIKRKR <b>D</b> HV | 247 |

**B**

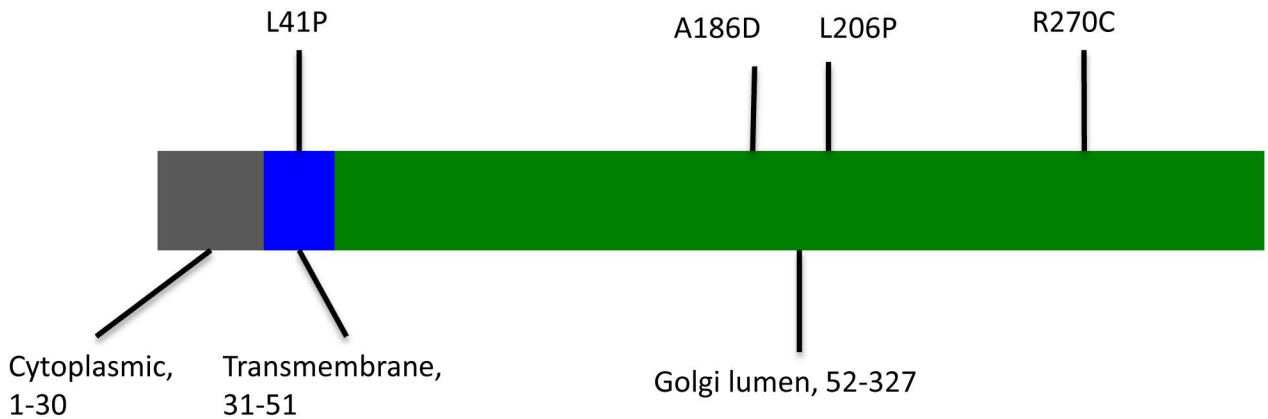

- A) Amino acid sequence alignments show homology across evolution at both leucine 41 and arginine 270. Alignments were generated using NCBI HomoloGene.
- B) Sequence annotation of  $\beta$ 1,4-galactosyltransferase 7 protein from UniProt. The protein is predicted to be a Type II transmembrane protein in the Golgi membrane. Amino acids 1-30 are predicted to be cytoplasmic (gray), 31-51 are predicted to be a transmembrane domain (blue) and 52-327 are predicted to be a Golgi luminal domain (green). Approximate locations of mutations found in our patient (p.L41P and p.R270C), as well as other previously described pathogenic variants (p.A186D, p.L206P) are indicated above the figure.
